# Supplementary material for: Exceptional soft tissues preservation in a mummified frog-eating Eocene salamander
Source: PeerJ. 2017 Oct 3;5:e3861. doi: 10.7717/peerj.3861 (PMC5629955; doi:10.7717/peerj.3861)
Supplement: Supplemental Information 2 — Blue line of the graph is radial profile; red line is global profile. [file peerj-05-3861-s002.xlsx]

## Sheet: Feuil1
Phosphotriton Bone Profiler analyses
If Min can be <0 and Max >1
Parameter	Mean Global value	SE Global value	Mean Angular value	SD Angular value	'0-5'	'6-11'	'12-17'	'18-23'	'24-29'	'30-35'	'36-41'	'42-47'	'48-53'	'54-59'	'60-65'	'66-71'	'72-77'	'78-83'	'84-89'	'90-95'	'96-101'	'102-107'	'108-113'	'114-119'	'120-125'	'126-131'	'132-137'	'138-143'	'144-149'	'150-155'	'156-161'	'162-167'	'168-173'	'174-179'	'180-185'	'186-191'	'192-197'	'198-203'	'204-209'	'210-215'	'216-221'	'222-227'	'228-233'	'234-239'	'240-245'	'246-251'	'252-257'	'258-263'	'264-269'
Min	-0.479	0.061	-2.962	2.284	-4.492	-4.144	-2.684	-1.214	-3.459	-5.117	-2.609	-10.143	-3.23	-0.82	-5.616	-1.345	-1.52	-0.908	-8.228	-2.642	-2.576	-1.733	-2.055	-6.514	-4.325	-3.937	-4.863	-5.959	-5.614	-5.037	-6.011	-2.525	-8.233	-4.123	-2.368	-7.047	-2.855	-0.723	-1.223	-1.734	-0.864	-2.794	-2.176	-1.736	-5.592	-5.524	-1.849	-3.964	-1.926
Max	1.005	0	1.675	0.475	1.782	1.482	1.788	1.615	1.568	0.891	1.696	3.173	1.841	1.284	0.966	2.019	1.306	1.127	0.921	1.796	1.671	1.864	1.454	2.39	1.755	2.39	1.751	2.406	2.185	1.636	1.773	1.401	2.837	1.927	1.818	2.524	1.815	1.128	1.142	1.523	1.885	1.818	1.698	1.818	1.867	1.832	2.307	1.915	1.912
S:1/Slope	0.088	0	0.061	0.057	0.039	0.075	0.035	0.045	0.047	0.022	0.033	0.042	0.019	0.306	0.013	0.03	0.039	0.198	0.022	0.035	0.029	0.03	0.026	0.036	0.053	0.026	0.077	0.029	0.077	0.089	0.056	0.06	0.052	0.042	0.034	0.031	0.015	0.112	0.106	0.032	0.02	0.033	0.026	0.03	0.061	0.021	0.018	0.021	0.03
P:transition	0.309	0.007	0.343	0.068	0.434	0.393	0.416	0.344	0.333	0.312	0.316	0.301	0.299	0.281	0.226	0.284	0.245	0.193	0.222	0.377	0.338	0.353	0.321	0.31	0.406	0.457	0.371	0.504	0.437	0.41	0.447	0.455	0.434	0.418	0.281	0.298	0.323	0.34	0.318	0.366	0.37	0.337	0.325	0.352	0.267	0.327	0.374	0.375	0.411
If not
Parameter	Mean Global value	SE Global value	Mean Angular value	SD Angular value	'0-5'	'6-11'	'12-17'	'18-23'	'24-29'	'30-35'	'36-41'	'42-47'	'48-53'	'54-59'	'60-65'	'66-71'	'72-77'	'78-83'	'84-89'	'90-95'	'96-101'	'102-107'	'108-113'	'114-119'	'120-125'	'126-131'	'132-137'	'138-143'	'144-149'	'150-155'	'156-161'	'162-167'	'168-173'	'174-179'	'180-185'	'186-191'	'192-197'	'198-203'	'204-209'	'210-215'	'216-221'	'222-227'	'228-233'	'234-239'	'240-245'	'246-251'	'252-257'	'258-263'	'264-269'
Min	0	0	-0.027	0.159	0	0	0	0	0	0	0	0	0	-0.82	0	0	0	0	0	0	0	0	0	0	0	0	0	0	0	0	0	0	0	0	0	0	0	0	0	0	0	0	0	0	0	0	0	0	0
Max	1	0	1.006	0.044	1	1	1	1	1	1	1	1	1	1.284	1	1	1	1	0.922	1	1	1	1	1	1	1	1	1	1	1	1	1	1	1	1	1	1	1	1	1	1	1	1	1	1	1	1	1	1
S:1/Slope	0.064	0.003	0.029	0.06	0.001	0.002	0.001	0.002	0.002	0.173	0.001	0.001	0.001	0.31	0.125	0.001	0.002	0.12	0.001	0.001	0.001	0.001	0.001	0.001	0.001	0.001	0.002	0.001	0.001	0.002	0.001	0.015	0.001	0.001	0.001	0.001	0.001	0.066	0.055	0.002	0.001	0.001	0.001	0.001	0.001	0.001	0.001	0.001	0.001
P:transition	0.386	0.005	0.387	0.078	0.491	0.51	0.45	0.371	0.39	0.368	0.349	0.36	0.32	0.276	0.227	0.289	0.29	0.338	0.29	0.41	0.371	0.37	0.35	0.36	0.48	0.48	0.49	0.54	0.54	0.552	0.54	0.531	0.501	0.47	0.31	0.34	0.34	0.415	0.426	0.39	0.37	0.37	0.35	0.371	0.36	0.361	0.38	0.4	0.431
Global analysis				To calculate presacral length (cm)
Maximum likelihood:-Ln L=91,387
AIC=190,774				Value of scale	Length of scale	Length of preserved presacral part	Number of preserved presacrals	Minimal number of presacrals	Maximal number of presacrals	Length assuming minimal number of vertebrae	Length with maximal number	Ln minimal length	Ln maximal length
r2=0,985				0.5	178	3.43645	8	10	18	4.29556	7.73201	1.45758	2.04537
Observed compactness=0,839
Modeled compactness=0,839
Modeled compactness at the center=0,003				1083	Length of triangle
Modeled compactness at the periphery=1,				569	Height of triangle
R/t (Currey & Alexander 1985) : 1,6291				1223.38	Length of specimen
CDI (Castanet et al. 2000) : 0,6138
Angular analysis
From 0 ° to 5 °
Maximum likelihood:-Ln L=0
AIC=8
r2=1
Observed compactness=0,854
Modeled compactness=0,76
Modeled compactness at the center=0,
Modeled compactness at the periphery=1,
R/t (Currey & Alexander 1985) : 1,9632
CDI (Castanet et al. 2000) : 0,5094
From 6 ° to 11 °
Maximum likelihood:-Ln L=0,693
AIC=9,386
r2=1
Observed compactness=0,745
Modeled compactness=0,743
Modeled compactness at the center=0,
Modeled compactness at the periphery=1,
R/t (Currey & Alexander 1985) : 2,0409
CDI (Castanet et al. 2000) : 0,49
From 12 ° to 17 °
Maximum likelihood:-Ln L=0,693
AIC=9,386
r2=1
Observed compactness=0,795				Blue line is radial profile; red line, global profile.
Modeled compactness=0,799
Modeled compactness at the center=0,
Modeled compactness at the periphery=1,
R/t (Currey & Alexander 1985) : 1,8182
CDI (Castanet et al. 2000) : 0,55
From 18 ° to 23 °
Maximum likelihood:-Ln L=0
AIC=8
r2=1
Observed compactness=0,865
Modeled compactness=0,862
Modeled compactness at the center=0,
Modeled compactness at the periphery=1,
R/t (Currey & Alexander 1985) : 1,59
CDI (Castanet et al. 2000) : 0,6289
From 24 ° to 29 °
Maximum likelihood:-Ln L=0,693
AIC=9,386
r2=1
Observed compactness=0,841
Modeled compactness=0,849
Modeled compactness at the center=0,
Modeled compactness at the periphery=1,
R/t (Currey & Alexander 1985) : 1,6393
CDI (Castanet et al. 2000) : 0,61
From 30 ° to 35 °
Maximum likelihood:-Ln L=12,712
AIC=33,423
r2=0,243
Observed compactness=0,781
Modeled compactness=0,785
Modeled compactness at the center=0,113
Modeled compactness at the periphery=0,974
R/t (Currey & Alexander 1985) : 1,5812
CDI (Castanet et al. 2000) : 0,6324
From 36 ° to 41 °
Maximum likelihood:-Ln L=0
AIC=8
r2=1
Observed compactness=0,897
Modeled compactness=0,881
Modeled compactness at the center=0,
Modeled compactness at the periphery=1,
R/t (Currey & Alexander 1985) : 1,5368
CDI (Castanet et al. 2000) : 0,6507
From 42 ° to 47 °
Maximum likelihood:-Ln L=0
AIC=8
r2=1
Observed compactness=0,864
Modeled compactness=0,872
Modeled compactness at the center=0,
Modeled compactness at the periphery=1,
R/t (Currey & Alexander 1985) : 1,5627
CDI (Castanet et al. 2000) : 0,6399
From 48 ° to 53 °
Maximum likelihood:-Ln L=0
AIC=8
r2=1
Observed compactness=0,895
Modeled compactness=0,899
Modeled compactness at the center=0,
Modeled compactness at the periphery=1,
R/t (Currey & Alexander 1985) : 1,4706
CDI (Castanet et al. 2000) : 0,68
From 54 ° to 59 °
Maximum likelihood:-Ln L=22,592
AIC=53,183
r2=0,358
Observed compactness=0,75
Modeled compactness=0,757
Modeled compactness at the center=0,193
Modeled compactness at the periphery=1,095
R/t (Currey & Alexander 1985) : 1,381
CDI (Castanet et al. 2000) : 0,7241
From 60 ° to 65 °
Maximum likelihood:-Ln L=11,732
AIC=31,464
r2=0,454
Observed compactness=0,905
Modeled compactness=0,904
Modeled compactness at the center=0,15
Modeled compactness at the periphery=0,998
R/t (Currey & Alexander 1985) : 1,2929
CDI (Castanet et al. 2000) : 0,7735
From 66 ° to 71 °
Maximum likelihood:-Ln L=0
AIC=8
r2=1
Observed compactness=0,92
Modeled compactness=0,918
Modeled compactness at the center=0,
Modeled compactness at the periphery=1,
R/t (Currey & Alexander 1985) : 1,4073
CDI (Castanet et al. 2000) : 0,7106
From 72 ° to 77 °
Maximum likelihood:-Ln L=0
AIC=8
r2=1
Observed compactness=0,923
Modeled compactness=0,917
Modeled compactness at the center=0,
Modeled compactness at the periphery=1,
R/t (Currey & Alexander 1985) : 1,4087
CDI (Castanet et al. 2000) : 0,7099
From 78 ° to 83 °
Maximum likelihood:-Ln L=20,765
AIC=49,529
r2=0,394
Observed compactness=0,848
Modeled compactness=0,842
Modeled compactness at the center=0,061
Modeled compactness at the periphery=0,996
R/t (Currey & Alexander 1985) : 1,5103
CDI (Castanet et al. 2000) : 0,6621
From 84 ° to 89 °
Maximum likelihood:-Ln L=14,656
AIC=37,312
r2=0,854
Observed compactness=0,808
Modeled compactness=0,846
Modeled compactness at the center=0,
Modeled compactness at the periphery=0,922
R/t (Currey & Alexander 1985) : 1,4082
CDI (Castanet et al. 2000) : 0,7101
From 90 ° to 95 °
Maximum likelihood:-Ln L=0,693
AIC=9,386
r2=1
Observed compactness=0,769
Modeled compactness=0,833
Modeled compactness at the center=0,
Modeled compactness at the periphery=1,
R/t (Currey & Alexander 1985) : 1,6949
CDI (Castanet et al. 2000) : 0,59
From 96 ° to 101 °
Maximum likelihood:-Ln L=0
AIC=8
r2=1
Observed compactness=0,875
Modeled compactness=0,862
Modeled compactness at the center=0,
Modeled compactness at the periphery=1,
R/t (Currey & Alexander 1985) : 1,5889
CDI (Castanet et al. 2000) : 0,6294
From 102 ° to 107 °
Maximum likelihood:-Ln L=0
AIC=8
r2=1
Observed compactness=0,875
Modeled compactness=0,864
Modeled compactness at the center=0,
Modeled compactness at the periphery=1,
R/t (Currey & Alexander 1985) : 1,5876
CDI (Castanet et al. 2000) : 0,6299
From 108 ° to 113 °
Maximum likelihood:-Ln L=0
AIC=8
r2=1
Observed compactness=0,863
Modeled compactness=0,877
Modeled compactness at the center=0,
Modeled compactness at the periphery=1,
R/t (Currey & Alexander 1985) : 1,5395
CDI (Castanet et al. 2000) : 0,6496
From 114 ° to 119 °
Maximum likelihood:-Ln L=0
AIC=8
r2=1
Observed compactness=0,879
Modeled compactness=0,872
Modeled compactness at the center=0,
Modeled compactness at the periphery=1,
R/t (Currey & Alexander 1985) : 1,5628
CDI (Castanet et al. 2000) : 0,6399
From 120 ° to 125 °
Maximum likelihood:-Ln L=0
AIC=8
r2=1
Observed compactness=0,755
Modeled compactness=0,77
Modeled compactness at the center=0,
Modeled compactness at the periphery=1,
R/t (Currey & Alexander 1985) : 1,9235
CDI (Castanet et al. 2000) : 0,5199
From 126 ° to 131 °
Maximum likelihood:-Ln L=0
AIC=8
r2=1
Observed compactness=0,783
Modeled compactness=0,77
Modeled compactness at the center=0,
Modeled compactness at the periphery=1,
R/t (Currey & Alexander 1985) : 1,9235
CDI (Castanet et al. 2000) : 0,5199
From 132 ° to 137 °
Maximum likelihood:-Ln L=0,693
AIC=9,386
r2=1
Observed compactness=0,683
Modeled compactness=0,763
Modeled compactness at the center=0,
Modeled compactness at the periphery=1,
R/t (Currey & Alexander 1985) : 1,9607
CDI (Castanet et al. 2000) : 0,51
From 138 ° to 143 °
Maximum likelihood:-Ln L=0
AIC=8
r2=1
Observed compactness=0,705
Modeled compactness=0,71
Modeled compactness at the center=0,
Modeled compactness at the periphery=1,
R/t (Currey & Alexander 1985) : 2,1741
CDI (Castanet et al. 2000) : 0,46
From 144 ° to 149 °
Maximum likelihood:-Ln L=0
AIC=8
r2=1
Observed compactness=0,691
Modeled compactness=0,71
Modeled compactness at the center=0,
Modeled compactness at the periphery=1,
R/t (Currey & Alexander 1985) : 2,1718
CDI (Castanet et al. 2000) : 0,4605
From 150 ° to 155 °
Maximum likelihood:-Ln L=0,811
AIC=9,623
r2=1
Observed compactness=0,692
Modeled compactness=0,696
Modeled compactness at the center=0,
Modeled compactness at the periphery=1,
R/t (Currey & Alexander 1985) : 2,2306
CDI (Castanet et al. 2000) : 0,4483
From 156 ° to 161 °
Maximum likelihood:-Ln L=0
AIC=8
r2=1
Observed compactness=0,698
Modeled compactness=0,71
Modeled compactness at the center=0,
Modeled compactness at the periphery=1,
R/t (Currey & Alexander 1985) : 2,1746
CDI (Castanet et al. 2000) : 0,4599
From 162 ° to 167 °
Maximum likelihood:-Ln L=2,007
AIC=12,014
r2=0,949
Observed compactness=0,723
Modeled compactness=0,719
Modeled compactness at the center=0,
Modeled compactness at the periphery=1,
R/t (Currey & Alexander 1985) : 2,1339
CDI (Castanet et al. 2000) : 0,4686
From 168 ° to 173 °
Maximum likelihood:-Ln L=0
AIC=8
r2=1
Observed compactness=0,722
Modeled compactness=0,755
Modeled compactness at the center=0,
Modeled compactness at the periphery=1,
R/t (Currey & Alexander 1985) : 2,0034
CDI (Castanet et al. 2000) : 0,4992
From 174 ° to 179 °
Maximum likelihood:-Ln L=0
AIC=8
r2=1
Observed compactness=0,868
Modeled compactness=0,779
Modeled compactness at the center=0,
Modeled compactness at the periphery=1,
R/t (Currey & Alexander 1985) : 1,8873
CDI (Castanet et al. 2000) : 0,5299
From 180 ° to 185 °
Maximum likelihood:-Ln L=0
AIC=8
r2=1
Observed compactness=0,942
Modeled compactness=0,905
Modeled compactness at the center=0,
Modeled compactness at the periphery=1,
R/t (Currey & Alexander 1985) : 1,4492
CDI (Castanet et al. 2000) : 0,69
From 186 ° to 191 °
Maximum likelihood:-Ln L=0
AIC=8
r2=1
Observed compactness=0,89
Modeled compactness=0,885
Modeled compactness at the center=0,
Modeled compactness at the periphery=1,
R/t (Currey & Alexander 1985) : 1,5152
CDI (Castanet et al. 2000) : 0,66
From 192 ° to 197 °
Maximum likelihood:-Ln L=0
AIC=8
r2=1
Observed compactness=0,875
Modeled compactness=0,885
Modeled compactness at the center=0,
Modeled compactness at the periphery=1,
R/t (Currey & Alexander 1985) : 1,5153
CDI (Castanet et al. 2000) : 0,6599
From 198 ° to 203 °
Maximum likelihood:-Ln L=12,868
AIC=33,736
r2=0,63
Observed compactness=0,803
Modeled compactness=0,815
Modeled compactness at the center=0,002
Modeled compactness at the periphery=1,
R/t (Currey & Alexander 1985) : 1,7108
CDI (Castanet et al. 2000) : 0,5845
From 204 ° to 209 °
Maximum likelihood:-Ln L=12,23
AIC=32,46
r2=0,734
Observed compactness=0,798
Modeled compactness=0,81
Modeled compactness at the center=0,001
Modeled compactness at the periphery=1,
R/t (Currey & Alexander 1985) : 1,7408
CDI (Castanet et al. 2000) : 0,5745
From 210 ° to 215 °
Maximum likelihood:-Ln L=0,693
AIC=9,386
r2=1
Observed compactness=0,861
Modeled compactness=0,849
Modeled compactness at the center=0,
Modeled compactness at the periphery=1,
R/t (Currey & Alexander 1985) : 1,6394
CDI (Castanet et al. 2000) : 0,61
From 216 ° to 221 °
Maximum likelihood:-Ln L=0,693
AIC=9,386
r2=1
Observed compactness=0,854
Modeled compactness=0,864
Modeled compactness at the center=0,
Modeled compactness at the periphery=1,
R/t (Currey & Alexander 1985) : 1,5873
CDI (Castanet et al. 2000) : 0,63
From 222 ° to 227 °
Maximum likelihood:-Ln L=0
AIC=8
r2=1
Observed compactness=0,851
Modeled compactness=0,864
Modeled compactness at the center=0,
Modeled compactness at the periphery=1,
R/t (Currey & Alexander 1985) : 1,5876
CDI (Castanet et al. 2000) : 0,6299
From 228 ° to 233 °
Maximum likelihood:-Ln L=0
AIC=8
r2=1
Observed compactness=0,891
Modeled compactness=0,878
Modeled compactness at the center=0,
Modeled compactness at the periphery=1,
R/t (Currey & Alexander 1985) : 1,5388
CDI (Castanet et al. 2000) : 0,6499
From 234 ° to 239 °
Maximum likelihood:-Ln L=0
AIC=8
r2=1
Observed compactness=0,87
Modeled compactness=0,861
Modeled compactness at the center=0,
Modeled compactness at the periphery=1,
R/t (Currey & Alexander 1985) : 1,5894
CDI (Castanet et al. 2000) : 0,6292
From 240 ° to 245 °
Maximum likelihood:-Ln L=0
AIC=8
r2=1
Observed compactness=0,877
Modeled compactness=0,872
Modeled compactness at the center=0,
Modeled compactness at the periphery=1,
R/t (Currey & Alexander 1985) : 1,5625
CDI (Castanet et al. 2000) : 0,64
From 246 ° to 251 °
Maximum likelihood:-Ln L=0
AIC=8
r2=1
Observed compactness=0,884
Modeled compactness=0,872
Modeled compactness at the center=0,
Modeled compactness at the periphery=1,
R/t (Currey & Alexander 1985) : 1,5637
CDI (Castanet et al. 2000) : 0,6395
From 252 ° to 257 °
Maximum likelihood:-Ln L=0
AIC=8
r2=1
Observed compactness=0,87
Modeled compactness=0,857
Modeled compactness at the center=0,
Modeled compactness at the periphery=1,
R/t (Currey & Alexander 1985) : 1,6141
CDI (Castanet et al. 2000) : 0,6195
From 258 ° to 263 °
Maximum likelihood:-Ln L=0
AIC=8
r2=1
Observed compactness=0,812
Modeled compactness=0,841
Modeled compactness at the center=0,
Modeled compactness at the periphery=1,
R/t (Currey & Alexander 1985) : 1,6668
CDI (Castanet et al. 2000) : 0,6
From 264 ° to 269 °
Maximum likelihood:-Ln L=0
AIC=8
r2=1
Observed compactness=0,725
Modeled compactness=0,814
Modeled compactness at the center=0,
Modeled compactness at the periphery=1,
R/t (Currey & Alexander 1985) : 1,756
CDI (Castanet et al. 2000) : 0,5695
From 270 ° to 275 °
Maximum likelihood:-Ln L=0
AIC=8
r2=1
Observed compactness=0,859
Modeled compactness=0,899
Modeled compactness at the center=0,
Modeled compactness at the periphery=1,
R/t (Currey & Alexander 1985) : 1,4707
CDI (Castanet et al. 2000) : 0,6799
From 276 ° to 281 °
Maximum likelihood:-Ln L=9,487
AIC=26,973
r2=0,708
Observed compactness=0,842
Modeled compactness=0,823
Modeled compactness at the center=0,002
Modeled compactness at the periphery=1,
R/t (Currey & Alexander 1985) : 1,6858
CDI (Castanet et al. 2000) : 0,5932
From 282 ° to 287 °
Maximum likelihood:-Ln L=14,22
AIC=36,44
r2=0,575
Observed compactness=0,795
Modeled compactness=0,792
Modeled compactness at the center=0,002
Modeled compactness at the periphery=1,
R/t (Currey & Alexander 1985) : 1,7879
CDI (Castanet et al. 2000) : 0,5593
From 288 ° to 293 °
Maximum likelihood:-Ln L=12,895
AIC=33,79
r2=0,645
Observed compactness=0,819
Modeled compactness=0,818
Modeled compactness at the center=0,001
Modeled compactness at the periphery=1,
R/t (Currey & Alexander 1985) : 1,7075
CDI (Castanet et al. 2000) : 0,5856
From 294 ° to 299 °
Maximum likelihood:-Ln L=11,109
AIC=30,217
r2=0,743
Observed compactness=0,919
Modeled compactness=0,907
Modeled compactness at the center=0,004
Modeled compactness at the periphery=1,
R/t (Currey & Alexander 1985) : 1,4137
CDI (Castanet et al. 2000) : 0,7074
From 300 ° to 305 °
Maximum likelihood:-Ln L=8,145
AIC=24,291
r2=0,544
Observed compactness=0,951
Modeled compactness=0,909
Modeled compactness at the center=0,002
Modeled compactness at the periphery=1,
R/t (Currey & Alexander 1985) : 1,4117
CDI (Castanet et al. 2000) : 0,7084
From 306 ° to 311 °
Maximum likelihood:-Ln L=0,693
AIC=9,387
r2=1
Observed compactness=0,85
Modeled compactness=0,917
Modeled compactness at the center=0,
Modeled compactness at the periphery=1,
R/t (Currey & Alexander 1985) : 1,4085
CDI (Castanet et al. 2000) : 0,71
From 312 ° to 317 °
Maximum likelihood:-Ln L=4,212
AIC=16,424
r2=0,676
Observed compactness=0,963
Modeled compactness=0,91
Modeled compactness at the center=0,004
Modeled compactness at the periphery=1,
R/t (Currey & Alexander 1985) : 1,4033
CDI (Castanet et al. 2000) : 0,7126
From 318 ° to 323 °
Maximum likelihood:-Ln L=28,757
AIC=65,515
r2=0,416
Observed compactness=0,758
Modeled compactness=0,746
Modeled compactness at the center=0,353
Modeled compactness at the periphery=1,065
R/t (Currey & Alexander 1985) : 1,3467
CDI (Castanet et al. 2000) : 0,7425
From 324 ° to 329 °
Maximum likelihood:-Ln L=15,688
AIC=39,377
r2=0,727
Observed compactness=0,827
Modeled compactness=0,823
Modeled compactness at the center=0,025
Modeled compactness at the periphery=0,998
R/t (Currey & Alexander 1985) : 1,6174
CDI (Castanet et al. 2000) : 0,6183
From 330 ° to 335 °
Maximum likelihood:-Ln L=0
AIC=8
r2=1
Observed compactness=0,9
Modeled compactness=0,885
Modeled compactness at the center=0,
Modeled compactness at the periphery=1,
R/t (Currey & Alexander 1985) : 1,5146
CDI (Castanet et al. 2000) : 0,6602
From 336 ° to 341 °
Maximum likelihood:-Ln L=4,787
AIC=17,574
r2=0,863
Observed compactness=0,864
Modeled compactness=0,882
Modeled compactness at the center=0,
Modeled compactness at the periphery=1,
R/t (Currey & Alexander 1985) : 1,5195
CDI (Castanet et al. 2000) : 0,6581
From 342 ° to 347 °
Maximum likelihood:-Ln L=9,031
AIC=26,061
r2=0,66
Observed compactness=0,841
Modeled compactness=0,837
Modeled compactness at the center=0,001
Modeled compactness at the periphery=1,
R/t (Currey & Alexander 1985) : 1,6478
CDI (Castanet et al. 2000) : 0,6069
From 348 ° to 353 °
Maximum likelihood:-Ln L=6,583
AIC=21,167
r2=0,762
Observed compactness=0,811
Modeled compactness=0,808
Modeled compactness at the center=0,134
Modeled compactness at the periphery=1,
R/t (Currey & Alexander 1985) : 1,8892
CDI (Castanet et al. 2000) : 0,5293
From 354 ° to 359 °
Maximum likelihood:-Ln L=6,065
AIC=20,13
r2=0,395
Observed compactness=0,926
Modeled compactness=0,859
Modeled compactness at the center=0,002
Modeled compactness at the periphery=1,
R/t (Currey & Alexander 1985) : 1,5696
CDI (Castanet et al. 2000) : 0,6371
[truncated: 15 more columns]
